# Supplementary material for: The Main Nile Valley at the End of the Pleistocene (28–15 ka): Dispersal Corridor or Environmental Refugium?
Source: Frontiers journal article supplement (doi:10.3389/feart.2020.607183), 2021-01-27
Supplement: Data_Sheet_1.pdf [file Data_Sheet_1.pdf]

### **Presentation of the supplementary information file for:**

Alice Leplongeon, “The main Nile Valley at the end of the Pleistocene (28-15 ka): corridor of dispersal or environmental refugium?”, submitted to *Frontiers in Earth Sciences*.

This supplementary information is composed of four files:

- **SupplInfo1a.pdf** (this file) – presentation of supplementary information
- **SupplInfo1b-SITES.csv** – raw dataset of all archaeological sites considered in the manuscript
- **SupplInfo1c-DATES.csv** – raw dataset of all dates associated with the archaeological sites considered in the manuscript
- **SupplInfo1d-DATES.pdf** – same as SupplInfo1c-DATES but in pdf to enhance data visualization

### **SupplInfo1b-SITES**

In this csv file, you will find an inventory of sites attributed to the Late Palaeolithic.

Data collection method (see also section 4.2 of the manuscript):

This inventory was constituted in parallel with the creation of the database for the ‘Big Dry’ Project funded by the French National Research Agency (ANR).

**Site:** What is defined as a site, particularly when dealing with surface material in desert areas, is a matter of debate. In the frame of this paper, the designation used by the excavators was kept. Only in the case of sites with different areas of the site (localities) assigned to different cultural entities were these areas considered as separate sites. For example, site 8905 is divided in several localities, but all are attributed to the Qadan, and it was thus considered as a single site. On the contrary, site E71P1, located in the Edfu area consisted of material collected at four arbitrarily-defined localities, two of which were later attributed to the Kubbanian and two others to the Levallois Idfuan. In this study, E71P1 is therefore considered as two sites. Only sites with an – even limited – description of the context (location, geological description) were considered. This resulted for example in the exclusion from the database of the surface occurrences in the Nile Delta surveyed in the first part of the 20<sup>th</sup> century and mentioned above, as no description of the geological setting of the sites is available. Similarly, and despite the presence of geological descriptions, the seminal work of E. Vignard in the plain of Kom Ombo could not be included in the database as Vignard’s survey methods do not allow the identification of sites. Sites where only surface and limited subsurface material was found (usually within ten centimetres below the surface) were considered as having only one ‘archaeological’ layer. Only in the case of sites with stratified evidence for multiple layers, were sites divided into two or more archaeological layers. Absolute dates associated with the archaeological layers were also systematically collected in the database.

The csv file includes the following information:

- SITE (site denomination)
- REGION (site region)
- COUNTRY (site country)
- LAT (approximative latitude)
- LONG (approximative longitude)
- FAKHURIAN, GEMAIAN, KUBBANIYAN, HALFAN, BALLANAN-SILSILIAN, QADAN, AFIAN, ISNAN, SEBILIAN, LEVALLOIS IDFUAN, SHUWIKHATIAN, LATE PAL – OTHER (Late Palaeolithic - other cultural entities, or undefined).

These are the different industries or cultural entities defined for the Late Palaeolithic in the Nile Valley. Numbers indicate the number of archaeological layers attributed to one or more of these entities per site (see also Tables 2 and 3 of the manuscript).

- BIBLIOGRAPHICAL REFERENCE (main bibliographical references for each site in author-date format, see below for full references)

### **SupplInfo1c-DATES.csv and SupplInfo1d-DATES.pdf**

These two files present all collected absolute dates associated with Late Palaeolithic contexts in two different formats (.csv to facilitate data use and queries; .pdf to facilitate data visualisation).

It includes the following information:

- REF DATE (Date reference)
- SITE
- REGION
- PERIOD (LatePal: Late Palaeolithic or LateUpperPal: Late Upper Palaeolithic)
- CULTURAL ENTITY (attribution to a specific cultural entity or broadly to the Late Palaeolithic (LatePal). Question marks are noted when attribution is questioned)
- ARCHAEOLOGY (Is the date coming from a layer containing archaeological material ? Yes / No)
- DATE (BP, Before Present)
- ERROR (Error margin associated with the date,  $\pm$ )
- CALBPfrom, CALBPto - Calibrated ranges for the date, calculated using Intcal20 (Reimer et al., in press) and CALIB 8.1 (Stuiver & Reimer, 1993)
- CONF INT (Confidence Interval for the calibrated range). All dates were calibrated using two-sigma ranges (95.4% for the confidence interval)

- CAL. CURVE (Calibration curve, Intcal20 (Reimer et al., in press))
- MATERIAL DATED
- DATING METHOD (14C = radiocarbon, OSL = Optically Stimulated Luminescence, TL = Thermoluminescence)
- DATING METHOD PRECISION (blank = conventional radiocarbon method, AMS = Accelerator Mass Spectrometry, OSL-SAR = Optically Stimulated Luminescence, single-aliquot regenerative-dose protocol)
- COUNTRY (Country of the site where the dated sample comes from)
- SAMPLE LOC (Sample Localization)
- SEDIMENTARY DESCRIPTION (of the layer where the sample comes from)
- REMARKS STRATIGRAPHY (Remarks on the layer where the sample comes from)
- SAMPLE ADDITIONAL INFO (Additional information on the dated sample, e.g., precision on its localisation)
- FIELDWORK DATES (corresponding to when the layer where the sample comes from was excavated)
- EXCAVATING TEAM (which project excavated the layer where the dated sample was recovered)
- REFERENCES (general bibliographical references for the site and the layer where the dated sample comes from)
- REFERENCES DATES (specific bibliographical references for the published date)
- REMARKS DATES
- INCLUDED IN FINAL DATASET (Yes, No. All samples with 'YES' were considered in the study, e.g., see figures 4 and 5 of the manuscript. All samples with 'NO' were not included in the final dataset and the reason why is given in the next column)
- REASON FOR DATE REJECTION (Reason why the date was not included in the dataset used in the manuscript. Reasons include unclear association with archaeological material, indirect association with archaeological material (thus giving minimal or maximal ages), suspicion of contamination, problematic dated material (e.g. carbonate), dates with a too great error margin (arbitrary limit fixed at 1000 years).

## BIBLIOGRAPHICAL REFERENCES MENTIONED IN THE SUPPLEMENTARY INFORMATION

- Banks, W. E. (1989a). "Report on Site E-81-3: An Early Late Paleolithic Site near the Mouth of Wadi Kubbbaniya," in *The prehistory of Wadi Kubbbaniya*, vol. 3, eds. F. Wendorf, R. Schild, and A. E. Close (Dallas: SMU Press), 303–320.
- Banks, W. E. (1989b). "Report on Site E-81-4: An Early Late Paleolithic Site near the Mouth of Wadi Kubbbaniya," in *The prehistory of Wadi Kubbbaniya*, vol. 3, eds. F. Wendorf, R. Schild, and A. E. Close (Dallas: SMU Press), 321–335.
- Banks, W. E. (1989c). "Report on Site E-82-3: An Early Late Paleolithic Site near the Mouth of Wadi Kubbbaniya," in *The prehistory of Wadi Kubbbaniya*, vol. 3, eds. F. Wendorf, R. Schild, and A. E. Close (Dallas: SMU Press), 336–350.
- Banks, W. E., Signe Snortland, J., Scott Cummings, L., Gatto, M. C., and Usai, D. (2015). The Terminal Late Palaeolithic in Wadi Kubbbaniya, Egypt. *Antiquity Project Gallery* 89. Available at: <https://antiquity.ac.uk/projgall/banks346>.
- Buckley, J. D., and Willis, E. H. (1969). Isotopes' Radiocarbon Measurements VII. *Radiocarbon* 11, 53–105. doi:10.1017/S003822200064444.
- Butzer, K. W., and Hansen, C. L. (1968). *Desert and river in Nubia: geomorphology and prehistoric environments at the Aswan reservoir*. Madison: University of Wisconsin press.
- Close, A. E. (1984). Current Research and Recent Radiocarbon Dates from Northern Africa, II. *The Journal of African History* 25, 1–24.
- Close, A. E. (1988). Current Research and Recent Radiocarbon Dates from Northern Africa, III. *The Journal of African History* 29, 145–176. doi:10.1017/S0021853700023616.
- Close, A. E. (1989a). "Report on Site E-78-3: A deeply stratified sequence of early Kubbbaniyan occupations," in *The prehistory of Wadi Kubbbaniya*, vol. 3, eds. F. Wendorf, R. Schild, and A. E. Close (Dallas: SMU Press), 375–469.
- Close, A. E. (1989b). "Report on Site E-81-1: An Early Kubbbaniyan Site on the Edge of the Kubbbaniyan Dune Field," in *The prehistory of Wadi Kubbbaniya*, vol. 3, eds. F. Wendorf, R. Schild, and A. E. Close (Dallas: SMU Press), 490–523.
- Close, A. E. (1989c). "Report on Site E-83-4: A small Afian surface concentration in the Kubbbaniya Dune Field," in *The prehistory of Wadi Kubbbaniya*, vol. 3, eds. F. Wendorf, R. Schild, and A. E. Close (Dallas: SMU Press), 697–704.
- Close, A. E., Wendorf, F., and Schild, R. (1979). *The Afian: a study of stylistic variation in a Nilotic industry*. Dallas: Department of Anthropology, Southern Methodist University.
- Crane, H. R., and Griffin, J. B. (1965). University of Michigan Radiocarbon Dates X. *Radiocarbon* 7, 123–152. doi:10.1017/S003822200037115.

- Crane, H. R., and Griffin, J. B. (1966). University of Michigan Radiocarbon Dates XI. *Radiocarbon* 8, 256–285. doi:10.1017/S003822200000163.
- Dufour, E., Van Neer, W., Vermeersch, P. M., and Patterson, W. P. (2018). Hydroclimatic conditions and fishing practices at Late Paleolithic Makhadma 4 (Egypt) inferred from stable isotope analysis of otoliths. *Quaternary International* 471, 190–202. doi:10.1016/j.quaint.2017.09.026.
- Greene, D. L., and Armelagos, G. (1972). *The Wadi Halfa mesolithic population*. Amherst: University of Massachusetts.
- Haas, H. (1989). “The radiocarbon dates from Wadi Kubbania,” in *The Prehistory of Wadi Kubbania, Vol 2, Stratigraphy, paleoeconomy, and environment*, eds. F. Wendorf, R. Schild, and A. Close (Dallas: Southern Methodist University Press), 274–279.
- Haas, H., and Haynes, V. (1975). Southern Methodist University radiocarbon date list II. *Radiocarbon* 17, 354–363.
- Hassan, F. A. (1972). Note on Sebilian Sites from Dishna Plain. *Chronique d’Egypte* 47, 11–16. doi:10.1484/J.CDE.2.308255.
- Hassan, F. A. (1974). *The archaeology of the Dishna Plain, Egypt: A study of a Late Palaeolithic settlement*. Cairo: The geological survey of Egypt and mining authority.
- Hewes, G. W., Irwin, H., Papworth, M., and Saxe, A. (1964). A New Fossil Human Population from the Wadi Halfa Area, Sudan. *Nature* 203, 341. doi:10.1038/203341a0.
- Hill, C. L., Wendorf, F., and Schild, R. (1989). “Report on Site E-84-1: A Multicomponent Paleolithic Site at Wadi Kubbania,” in *The prehistory of Wadi Kubbania, vol. 3*, eds. F. Wendorf, R. Schild, and A. E. Close (Dallas: SMU Press), 365–374.
- Huyge, D., Aubert, M., Barnard, H., Claes, W., Darnell, J. C., De Dapper, M., et al. (2007). “Lascaux along the Nile”: Late Pleistocene rock art in Egypt. *Antiquity Project Gallery* 81. Available at: <https://www.antiquity.ac.uk/projgall/huyge313/> [Accessed June 22, 2020].
- Huyge, D., Vandenberghe, D. A. G., Dapper, M. D., Mees, F., Claes, W., and Darnell, J. C. (2011). First evidence of Pleistocene rock art in North Africa: securing the age of the Qurta petroglyphs (Egypt) through OSL dating. *Antiquity* 85, 1184–1193. doi:10.1017/S0003598X00061998.
- Huyge, D., Vermeersch, P. M., and Paulissen, E. (2000). “Arab el Sabaha, an Epipalaeolithic Site,” in *Palaeolithic Living Sites in Upper and Middle Egypt* Egyptian Prehistory Monographs., ed. P. M. Vermeersch (Leuven: Leuven University Press), 289–312.
- Irwin, H. T., Irwin, L. F., and Wheat, J. B. (1968). *University of Colorado investigations of Paleolithic and Epipaleolithic sites in the Sudan, Africa*. University of Utah Press.
- Irwin, H., and Wheat, J. B. (1965). Report of the Palaeolithic Section University of Colorado Nubian Expedition. *Kush* XIII, 17–23.

- Kabacinski, J., and Usai, D. (1999). *Late Palaeolithic Chert Assemblages from the Upper Egyptian Nile Valley*. Poznan: Poznan Prehistoric Society.
- Kelany, A. (2012). More Late Palaeolithic Rock Art at Wadi Abu Subeira, Upper Egypt. *Bulletin des Musées Royaux d'Art et d'Histoire* 83, 5–22.
- Kelany, A., Tohami, A., Harby, H., Mokhtar, M., Elhomosany, S., Badawy, M., et al. (2015). Surveying Work at Wadi Abu Subeira, Season 2012. *From the Delta to the Cataract*, 98–107. doi:10.1163/9789004293458\_010.
- Kobusiewicz, M. (1989a). “Report on E-78-5e: A small Ballanan-Silsilian site near the Mouth of Wadi Kubbaniya,” in *The Prehistory of Wadi Kubbaniya*, vol. 3, eds. F. Wendorf, R. Schild, and A. E. Close (Dallas: SMU Press), 669–674.
- Kobusiewicz, M. (1989b). “Report on Site E-78-5: A Kubbaniyan Site in the Mouth of Wadi Kubbaniya,” in *The prehistory of Wadi Kubbaniya*, vol. 3, eds. F. Wendorf, R. Schild, and A. E. Close (Dallas: SMU Press), 654–668.
- Kobusiewicz, M. (1989c). “Report on Site E-78-5f: An Apparent Single-Occupation Site near the Mouth of Wadi Kubbaniy,” in *The prehistory of Wadi Kubbaniya*, vol. 3, eds. F. Wendorf, R. Schild, and A. E. Close (Dallas: SMU Press), 675–678.
- Kobusiewicz, M. (1989d). “Report on Site E-78-9: An Early Kubbaniyan Site in the Mouth of Wadi Kubbaniya,” in *The prehistory of Wadi Kubbaniya*, vol. 3, eds. F. Wendorf, R. Schild, and A. E. Close (Dallas: SMU Press), 643–653.
- Lubell, D. (1974). *The Fakhurian: a Late Paleolithic Industry from Upper Egypt*. Cairo: The Geological Survey of Egypt.
- Marks, A. E. (1968a). “The Halfan industry,” in *The Prehistory of Nubia*, ed. F. Wendorf (Dallas: Southern Methodist University Press), 392–460.
- Marks, A. E. (1968b). “The Sebilian Industry of the Second Cataract,” in *The Prehistory of Nubia*, ed. F. Wendorf (Dallas: Southern Methodist University Press), 461–531.
- Mohamed, A. A. B. (1993). Two upper Pleistocene kill-butchery sites in the Nile Valley of Egypt.
- Paulissen, E., and Vermeersch, P. M. (2000). “Stratigraphical context of the Palaeolithic sites in the Makhadma area,” in *Palaeolithic living sites in Upper and Middle Egypt*, ed. P. M. Vermeersch (Leuven: Leuven University Press), 75–90.
- Phillips, J. L. (1973). *Two final Paleolithic Sites in the Nile Valley and their external relations*. Ministry of Petroleum and Mineral Wealth, Geological Survey of Egypt and Mining Authority.
- Phillips, J. L., and Butzer, K. W. (1973). A Silsilian occupation site (GS-2B-II) of the Kom Ombo Plain, Upper Egypt: geology, archaeology and paleo-ecology. *Quaternaria* 17, 343–386.
- Reed, C. A. (1965). A Human Frontal Bone from the Late Pleistocene of the Kom Ombo Plain, Upper Egypt. *Man* 65, 101–104. doi:10.2307/2797442.

- Reed, C. A., Baumhoff, M. A., Butzer, K. W., and Boloyen, D. S. (1967). "Preliminary Report on the Archaeological Aspects of the Research of the Yale University Prehistoric Expedition to Nubia (Kom-Ombo) 1962-1963," in *Fouilles en Nubie: 1961-1963*, ed. International Campaign to Save the Monuments of Nubia (Le Caire: Organisme général des impressions gouvernementales), 145–156.
- Roubet, C. (1989a). "Report on Site E-82-1: A workshop for the Manufacture of Grinding Stones at Wadi Kubbaniya," in *The Prehistory of Wadi Kubbaniya*, eds. F. Wendorf, R. Schild, and A. E. Close (Dallas, Texas: SMU Press), 588–610.
- Roubet, C. (1989b). "The grinding stones of site E-78-3, Wadi Kubbaniya," in *The Prehistory of Wadi Kubbaniya*, vol. 3, eds. F. Wendorf, R. Schild, and A. E. Close (Dallas: SMU Press), 473–489.
- Schild, R., and Wendorf, F. (1989). "The Late Pleistocene Nile in Wadi Kubbaniya," in *The Prehistory of Wadi Kubbaniya*, vol. 2: *Stratigraphy, Paleoeconomy, and Environment*, eds. F. Wendorf, R. Schild, and A. E. Close (Dallas: Southern Methodist University Press), 15–100.
- Scoggins, B. (1989a). "Report on Site E-83-1: A Kubbaniyan Site on the Fronting Plain," in *The prehistory of Wadi Kubbaniya*, vol. 3, eds. F. Wendorf, R. Schild, and A. E. Close (Dallas: SMU Press), 611–620.
- Scoggins, B. (1989b). "Report on Site E-83-2: A Kubbaniyan Site on the Fronting Plain," in *The prehistory of Wadi Kubbaniya*, vol. 3, eds. F. Wendorf, R. Schild, and A. E. Close (Dallas: SMU Press), 621–631.
- Scoggins, B. (1989c). "Report on Site E-83-3: A Kubbaniyan Site on the Fronting Plain," in *The prehistory of Wadi Kubbaniya*, vol. 3, eds. F. Wendorf, R. Schild, and A. E. Close (Dallas: SMU Press), 632–642.
- Shiner, J. L. (1968). "The Cataract Tradition," in *The prehistory of Nubia*, ed. F. Wendorf (Dallas: Fort Burgwin Research Center; SMU Press), 535–629.
- Smith, P. E. L. (1964). Radiocarbon Dating of a Late Paleolithic Culture from Egypt. *Science* 145, 811–811. doi:10.1126/science.145.3634.811.
- Smith, P. E. L. (1966a). New prehistoric investigations at Kom Ombo (Upper Egypt). *Zephyrus: Revista de prehistoria y arqueología*, 31–46.
- Smith, P. E. L. (1966b). The Late Paleolithic of Northeast Africa in the light of recent research. *American Anthropologist* 68, 326–355.
- Smith, P. E. L. (1967). New investigations in the late Pleistocene archaeology of the Kom Ombo Plain (Upper Egypt). *Quaternaria* 9, 141–152.
- Smith, P. E. L. (1968). "A revised view of the Late Paleolithic of Egypt," in *La Préhistoire, problèmes et tendances* (Paris: CNRS Ed.), 391–399.
- Stuiver, M. (1969). Yale natural radiocarbon measurements IX. *Radiocarbon* 11, 545–658.

- Trautman, M. A., and Willis, E. H. (1966). Isotopes, Inc. Radiocarbon Measurements V. *Radiocarbon* 8, 161–203. doi:10.1017/S0033822200000102.
- Usai, D. (2020). The Qadan, the Jebel Sahaba Cemetery and the Lithic Collection. *Archaeologia Polona* 58, 99–119.
- Van Neer, W., Augustynen, S., and Linkowski, T. (1993). Daily growth increments on fish otoliths as seasonality indicators on archaeological sites: The Tilapia from late palaeolithic Makhadma in Egypt. *International Journal of Osteoarchaeology* 3, 241–248. doi:10.1002/oa.1390030403.
- Van Neer, W., Paulissen, E., and Vermeersch, P. M. (2000). “Chronology, subsistence and environment at the Late Palaeolithic fishing sites of Makhadma 2 and 4,” in *Palaeolithic living sites in Upper and Middle Egypt* (Leuven: Leuven University Press), 271–288.
- Van Peer, P., Vermeersch, P. M., and Paulissen, E. (2010). *Chert quarrying, lithic technology and a modern human burial at the palaeolithic site of Taramsa 1, Upper Egypt*. Leuven: Leuven University Press.
- Vermeersch, P. M. ed. (2000). *Palaeolithic living sites in Upper and Middle Egypt*. Leuven: Leuven University Press.
- Vermeersch, P. M. ed. (2002). *Palaeolithic quarrying sites in Upper and Middle Egypt*. Leuven: Leuven University Press.
- Vermeersch, P. M., Gijssels, G., and Paulissen, E. (2000a). “Shuwikhat 2, a Silsilian site,” in *Palaeolithic living sites in Upper and Middle Egypt*, ed. P. M. Vermeersch (Leuven: Leuven University Press), 201–210.
- Vermeersch, P. M., Gijssels, G., and Paulissen, E. (2000b). “Surface Sites,” in *Palaeolithic Living Sites in Upper and Middle Egypt* Egyptian Prehistory Monographs., ed. P. M. Vermeersch (Leuven: Leuven University Press), 19–56.
- Vermeersch, P. M., Paulissen, E., and Gijssels, G. (2000c). “El Qat’a, a Late Palaeolithic Site,” in *Palaeolithic Living Sites in Upper and Middle Egypt* Egyptian Prehistory Monographs., ed. P. M. Vermeersch (Leuven: Leuven University Press), 289–312.
- Vermeersch, P. M., Paulissen, E., and Huyge, D. (2000d). “Makhadma 2, an Esnan site,” in *Palaeolithic Living Sites in Upper and Middle Egypt* Egyptian Prehistory Monographs., ed. P. M. Vermeersch (Leuven: Leuven University Press), 211–226.
- Vermeersch, P. M., Paulissen, E., and Huyge, D. (2000e). “Makhadma 4, a Late Palaeolithic fishing site,” in *Palaeolithic Living Sites in Upper and Middle Egypt* Egyptian Prehistory Monographs., ed. P. M. Vermeersch (Leuven: Leuven University Press), 227–270.
- Vermeersch, P. M., Paulissen, E., and Van Peer, P. (2000f). “Shuwikhat 1, an Upper Palaeolithic site,” in *Palaeolithic living sites in Upper and Middle Egypt*, ed. P. M. Vermeersch (Leuven: Leuven University Press), 111–154.
- Vermeersch, P. M., Van Peer, P., and Paulissen, E. (2000g). “El Abadiya, a Shuwikhatian Site,” in *Palaeolithic living sites in Upper and Middle Egypt*, ed. P. M. Vermeersch (Leuven: Leuven University Press), 159–200.



- Vermeersch, P., Paulissen, E., and Van Neer, W. (1989). The late Palaeolithic Makhadma sites (Egypt): environment and subsistence. *Studies in African Archaeology* 2, 87–114.
- Vermeersch, P., Van Neer, W., and Gullentops, F. (2006). “El Abadiya 3, Upper Egypt, a Late Palaeolithic site on the shore of a large Nile Lake,” in *Archeaology of Early Northeastern Africa, Studies in African Archaeology* (Poznan Archaeological Museum), 375–424. Available at: <https://lirias.kuleuven.be/bitstream/123456789/145232/3/Vermeersch-Abadiya3-2007.pdf> [Accessed June 15, 2017].
- Wendorf, F. (1968a). “Late Paleolithic sites in Egyptian Nubia,” in *The Prehistory of Nubia*, ed. F. Wendorf (Dallas: Fort Burgwin Research Center; SMU Press), 797–953.
- Wendorf, F. (1968b). “Site 117: A Nubian Final Paleolithic graveyard near Jebel Sahaba, Sudan,” in *The prehistory of Nubia*, ed. F. Wendorf (Dallas: Fort Burgwin Research Center; SMU Press), 954–995.
- Wendorf, F. ed. (1968c). *The prehistory of Nubia*. Dallas: Fort Burgwin Research Center; SMU Press.
- Wendorf, F. (1989a). “Report on Site E-78-2: A Small Kubbanian Locality,” in *The prehistory of Wadi Kubbania, vol. 3*, eds. F. Wendorf, R. Schild, and A. E. Close (Dallas: SMU Press), 524–535.
- Wendorf, F. (1989b). “Report on Site E-81-6: A Small Early Kubbanian Locality,” in *The prehistory of Wadi Kubbania, vol. 3*, eds. F. Wendorf, R. Schild, and A. E. Close (Dallas: SMU Press), 351–362.
- Wendorf, F. (1989c). “Report on Site E-81-7: A Small Site at the Western Edge of the Kubbanian Dune Field,” in *The prehistory of Wadi Kubbania, vol. 3*, eds. F. Wendorf, R. Schild, and A. E. Close (Dallas: SMU Press), 363–364.
- Wendorf, F., Close, A. E., Schild, R., Wieckowska, H., Gautier, A., Hillmann, G., et al. (1990). La Basse Vallée du Nil entre 21000 et 17000 BP. *L’Anthropologie* 94, 395–434.
- Wendorf, F., and Hill, C. (1989). “Report on site E-84-2: A Ballanan-Silsilian site near the Mouth of Wadi Kubbania,” in *The Prehistory of Wadi Kubbania, vol. 3*, eds. F. Wendorf, R. Schild, and A. E. Close (Dallas: SMU Press), 679–696.
- Wendorf, F., and Schild, R. (1975). “The Paleolithic of the Lower Nile Valley,” in *Problems in prehistory: North Africa and the Levant*, eds. F. Wendorf and A. E. Marks (Dallas: SMU Press), 127–169.
- Wendorf, F., and Schild, R. (1976). *Prehistory of the Nile Valley*. New: Academic Press.
- Wendorf, F., and Schild, R. (1986). *The Wadi Kubbania Skeleton: A Late Paleolithic Burial from Southern Egypt*. Southern Methodist University Press.
- Wendorf, F., and Schild, R. (1989). “Report on site E-81-5: A Small Isnan Assemblage,” in *The Prehistory of Wadi Kubbania, vol. 3*, eds. F. Wendorf, R. Schild, and A. E. Close (Dallas: SMU Press), 704–714.

- Wendorf, F., Schild, R., Baker, P., Gautier, A., Longo, L., and Mohamed, A. (1997). *A late paleolithic kill-butchery-camp in upper Egypt*. Dallas: SMU Press.
- Wendorf, F., Schild, R., and Close, A. E. eds. (1980). *Loaves and fishes : the prehistory of Wadi Kubbaniya*. Dallas, Texas : Department of Anthropology, Institute for the Study of Earth and Man, Southern Methodist University,.
- Wendorf, F., Schild, R., and Close, A. E. eds. (1989). *The Prehistory of Wadi Kubbaniya*. Dallas: SMU Press.
- Wendorf, F., Schild, R., Close, A. E., Donahue, D. J., Jull, A. J. T., Zabel, T. H., et al. (1984). New Radiocarbon Dates on the Cereals from Wadi Kubbaniya. *Science* 225, 645–646.
- Wendorf, F., Schild, R., and Haas, H. (1979a). A New Radiocarbon Chronology for Prehistoric Sites in Nubia. *Journal of Field Archaeology* 6, 219–223.  
doi:10.1179/009346979791489311.
- Wendorf, F., Schild, R., Hadidi, N. E., Close, A. E., Kobusiewicz, M., Wieckowska, H., et al. (1979b). Use of Barley in the Egyptian Late Paleolithic. *Science* 205, 1341–1347.  
doi:10.1126/science.205.4413.1341.
- Wieckowska, H. (1989). “Report on Site E-78-4: A Later Kubbaniyan Site in the Dune Field,” in *The prehistory of Wadi Kubbaniya, vol. 3*, eds. F. Wendorf, R. Schild, and A. E. Close (Dallas: SMU Press), 536–587.
- Zazzo, A. (2014). Bone and enamel carbonate diagenesis: A radiocarbon prospective. *Palaeogeography, Palaeoclimatology, Palaeoecology* 416, 168–178.  
doi:10.1016/j.palaeo.2014.05.006.
